# Supplementary material for: Modifying zeolite particle morphology and size using water/oil/surfactant mixtures as confined domains for zeolite growthElectronic supplementary information (ESI) available: XRD patterns of samples in Fig. 1 and 2, phase diagram of synthesis mixture at 353 K, FE-SEM images of fused spheres. See http://www.rsc.org/suppdata/cc/b3/b315646j/
Source: Royal Society of Chemistry journal article supplement (doi:10.1039/b315646j), 2004-01-01
Supplement: b315646j-s1.pdf [file b315646j-s1.pdf]

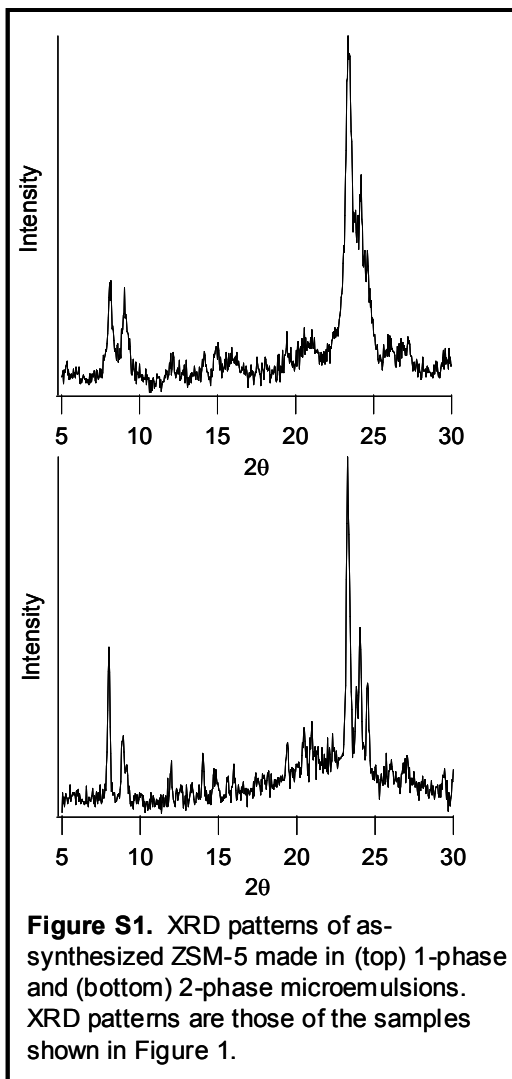

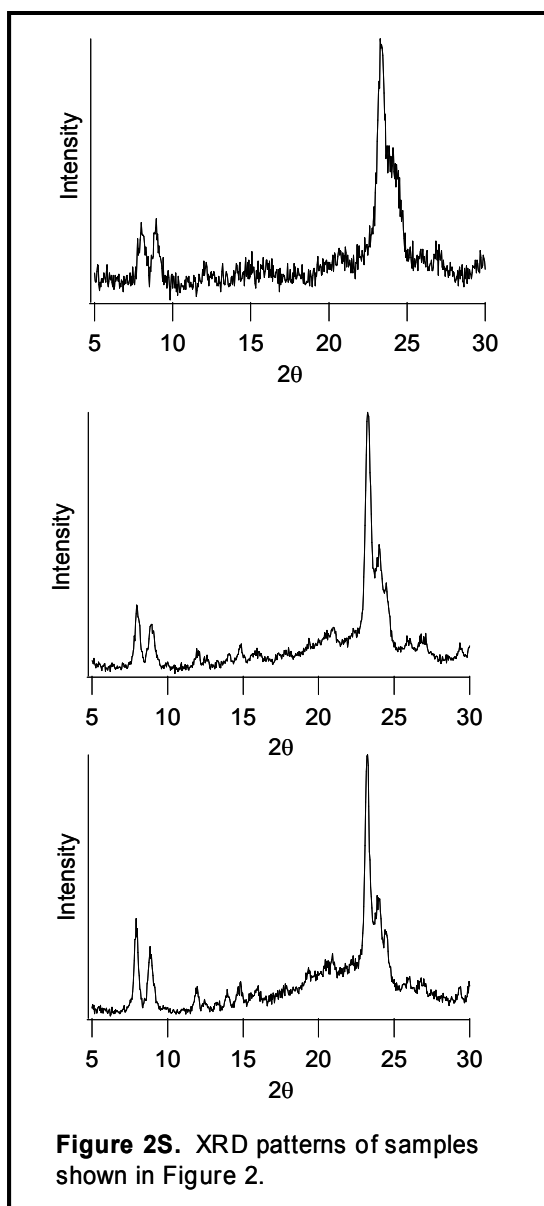

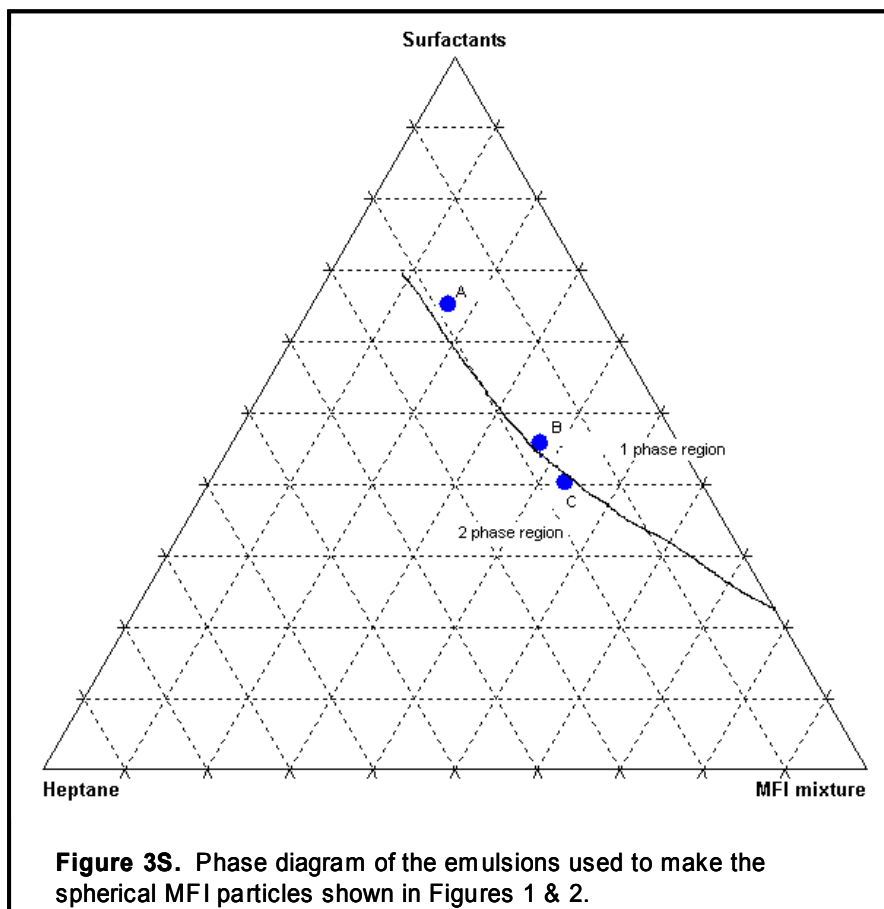

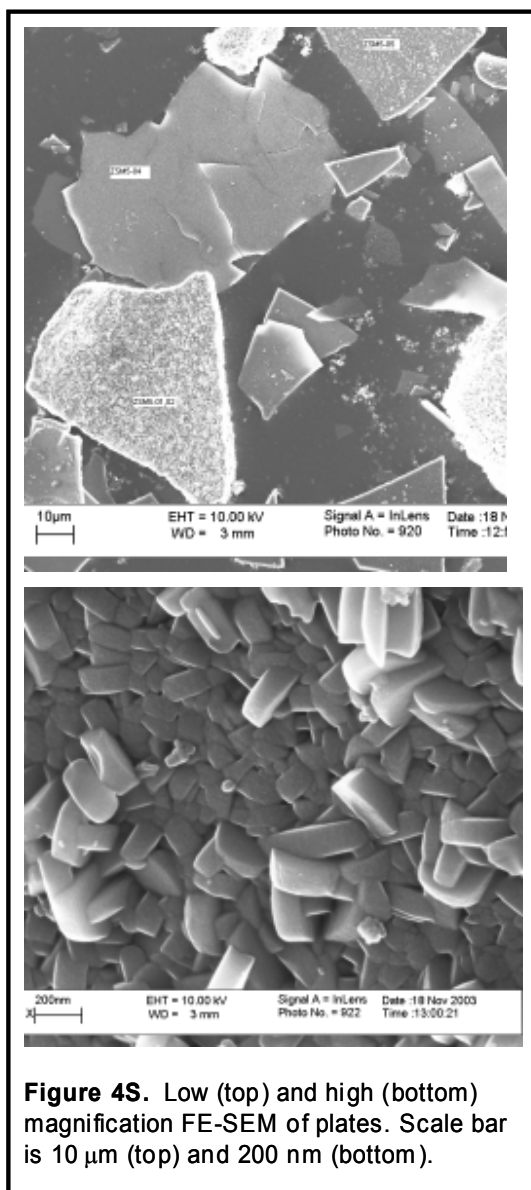

**Figure 4S.** Low (top) and high (bottom) magnification FE-SEM of plates. Scale bar is 10 μm (top) and 200 nm (bottom).

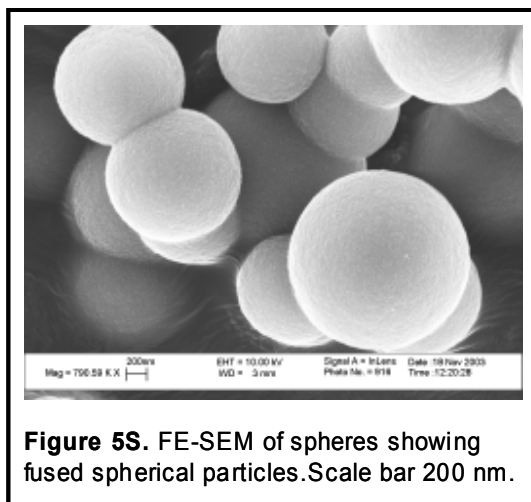

**Figure 5S.** FE-SEM of spheres showing fused spherical particles. Scale bar 200 nm.
