# Supplementary figures and images for: Modifying zeolite particle morphology and size using water/oil/surfactant mixtures as confined domains for zeolite growthElectronic supplementary information (ESI) available: XRD patterns of samples in Fig. 1 and 2, phase diagram of synthesis mixture at 353 K, FE-SEM images of fused spheres. See http://www.rsc.org/suppdata/cc/b3/b315646j/
Source: Royal Society of Chemistry journal article supplement (doi:10.1039/b315646j), 2004-01-01

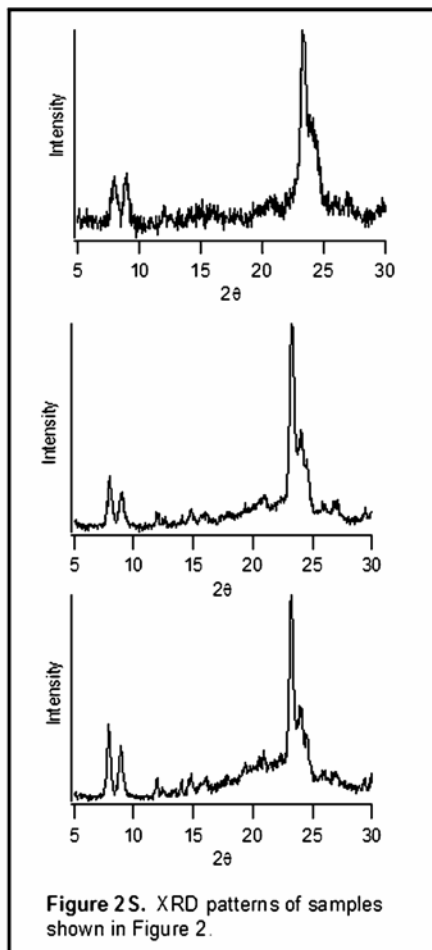

Supplement: b315646j-s2.pdf [file b315646j-s2.pdf]

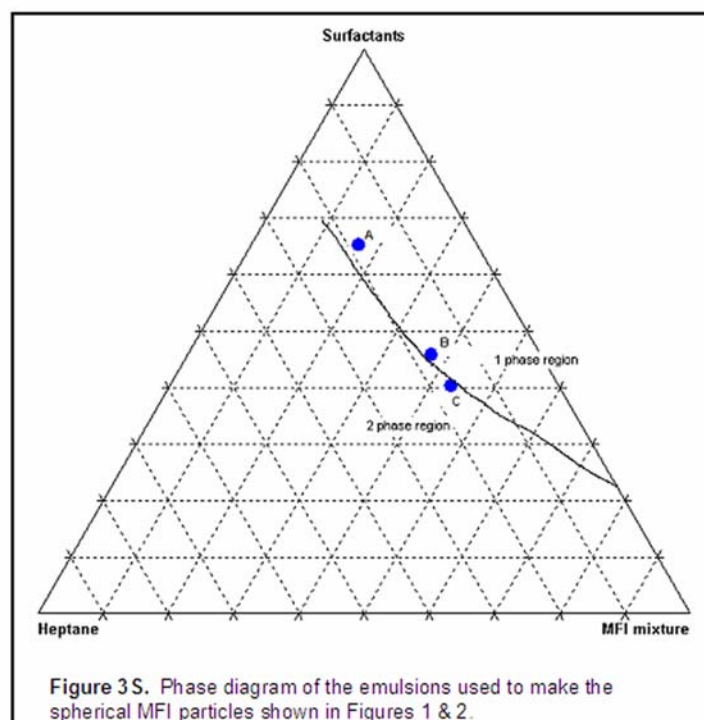

Supplement: b315646j-s3.pdf [file b315646j-s3.pdf]

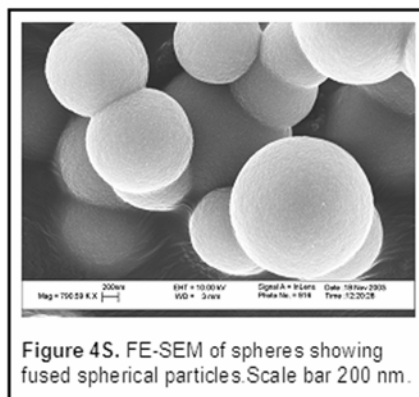

Supplement: b315646j-s4.pdf [file b315646j-s4.pdf]
